# Supplementary material for: High-performance polymeric ionic liquid–silica hybrid ionogel electrolytes for lithium metal batteries
Source: Royal Society of Chemistry journal article supplement (doi:10.1039/c6ta04767j), 2016-01-01
Supplement: c6ta04767j1.pdf [file c6ta04767j1.pdf]

## Electronic Supplementary Information

### High-performance polymeric ionic liquid-silica hybrid ionogel electrolytes for lithium metal batteries

*Xiaowei Li,<sup>a</sup> Sijian Li,<sup>a</sup> Zhengxi Zhang,<sup>\*a,c</sup> Jun Huang,<sup>a</sup> Li Yang<sup>\*a,b,c</sup> and Shin-ichi Hirano<sup>b</sup>*

a. School of Chemistry and Chemical Engineering, Shanghai Jiao Tong University,

Shanghai 200240, PR China

b. Hirano Institute for Materials Innovation, Shanghai Jiao Tong University,

Shanghai 200240, PR China

c. Shanghai Electrochemical Energy Devices Research Center,

Shanghai 200240, PR China

\*Corresponding Author:

Email: zhengxizhang@sjtu.edu.cn(Z. Zhang); liyangce@sjtu.edu.cn(L. Yang).

Tel.: +86 21 54748917. Fax: +86 21 54741297.

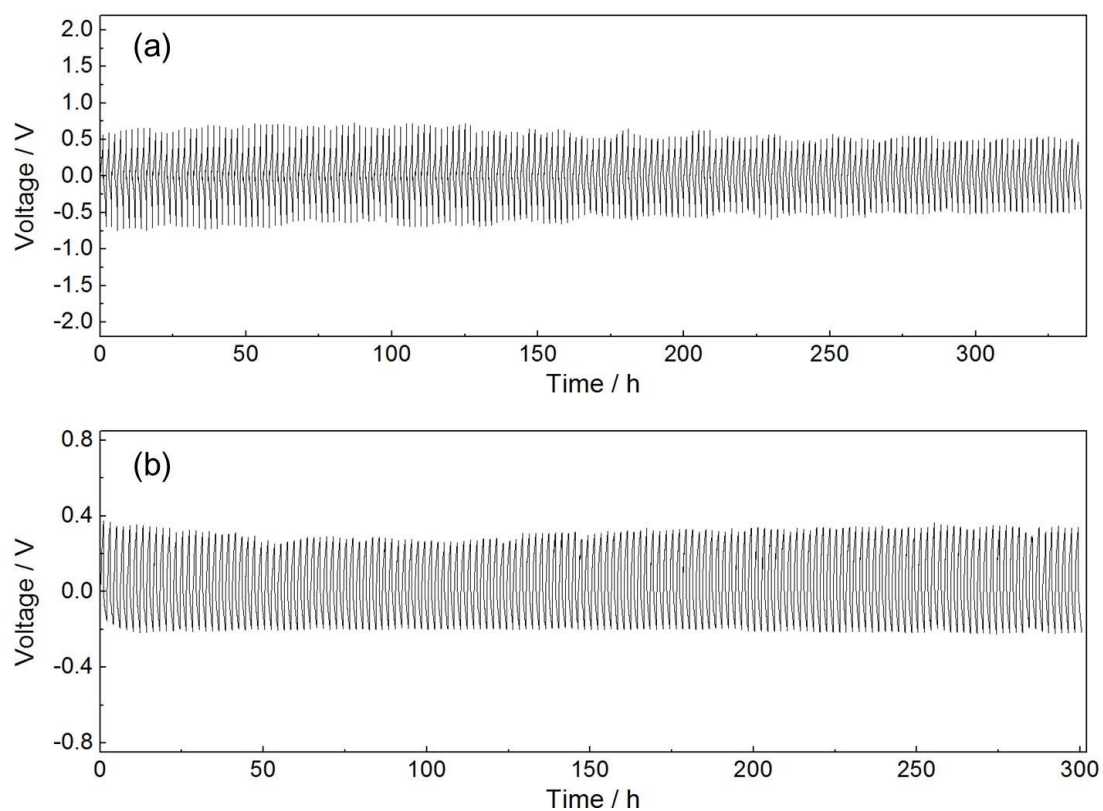

**Fig. S1.** Time-dependent voltage profile for (a) Li/[80/20]/70 HIGE/Li cell and (b) Li/Li-IL/Li cell at the current density of  $0.2 \text{ mA cm}^{-2}$ .

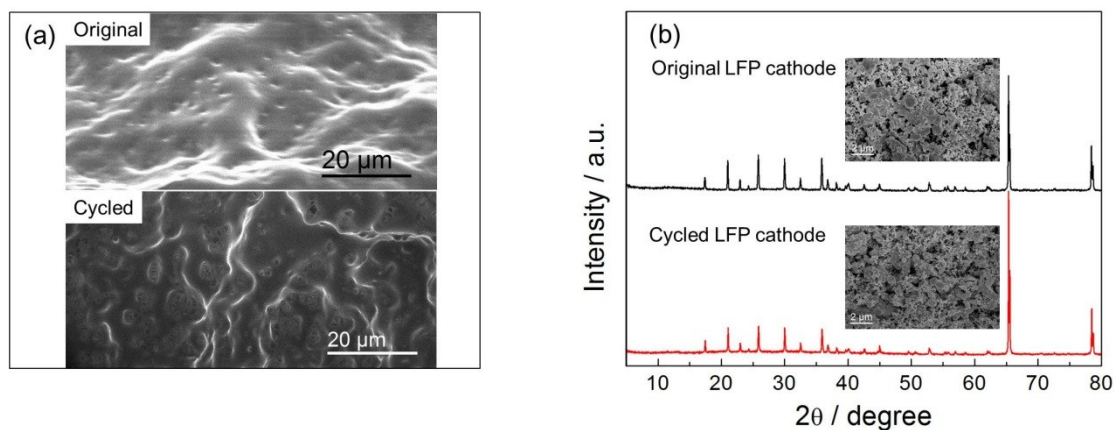

**Fig. S2.** (a) cross section SEM images of the [80/20]/70 HIGE membrane before and after the rate test; (b) SEM images and XRD patterns of the  $\text{LiFePO}_4$  cathode before and after the rate test.

The cross section SEM images of the HIGE membrane (Fig. S2 (a)) illustrates that the HIGE after cycles has the same morphology as the original HIGE. In addition, SEM images of the  $\text{LiFePO}_4$  cathode (Fig. S2 (b)) shows that compared with the original cathode, the surface of the cathode after the rate test is still homogeneous, and  $\text{LiFePO}_4$  particles have no obvious destruction. XRD patterns (Fig. S2 (b)) shows that no structural change can be observed for the  $\text{LiFePO}_4$  cathode after cycles.
